# Supplementary material
Source: PubMed Central journal article supplement (PMC4311147)
Supplement: supp_gau095_gau095supp_data.pdf [file supp_gau095_gau095supp_data.pdf]

# **Sexual selection and the adaptive evolution of PKDREJ protein in primates and rodents**

**Alberto Vicens<sup>1</sup>, Laura Gómez Montoto<sup>1</sup>, Francisco Couso-Ferrer<sup>2</sup>, Keith A. Sutton<sup>3</sup>, and Eduardo R. S. Roldan<sup>1\*</sup>**

<sup>1</sup>Reproductive Ecology and Biology Group, Museo Nacional de Ciencias Naturales (CSIC), 28006-Madrid, Spain <sup>2</sup>Departamento de Biología Medioambiental, Centro de Investigaciones Biológicas (CSIC), 28040-Madrid, Spain <sup>3</sup>Department of Cell Biology, University of Massachusetts Medical School, Worcester, MA 01655, USA

\*Correspondence address: roldane@mncn.csic.es

## **Supplementary data**

**Supplementary Figure S1** Amino acid alignment of PKDREJ in Muroidea.

**Supplementary Figure S2** Cladograms of rodents used for evolutionary analyses.

**Supplementary Table SI** Primers used for amplification of PKDREJ in rodent species.

**Supplementary Table SII** Body mass, testes mass and residual testes mass of primate species.

**Supplementary Table SIII** Body mass, testes mass and residual testes mass of rodent species.

**Supplementary Table SIV** Lineage-specific evolutionary rates of PKDREJ in rodents.

**Supplementary Figure S1** Amino acid alignment of PKDREJ in Muroidea. Protein sequences of the REJ domain for the 24 muroid species used in the study are shown.

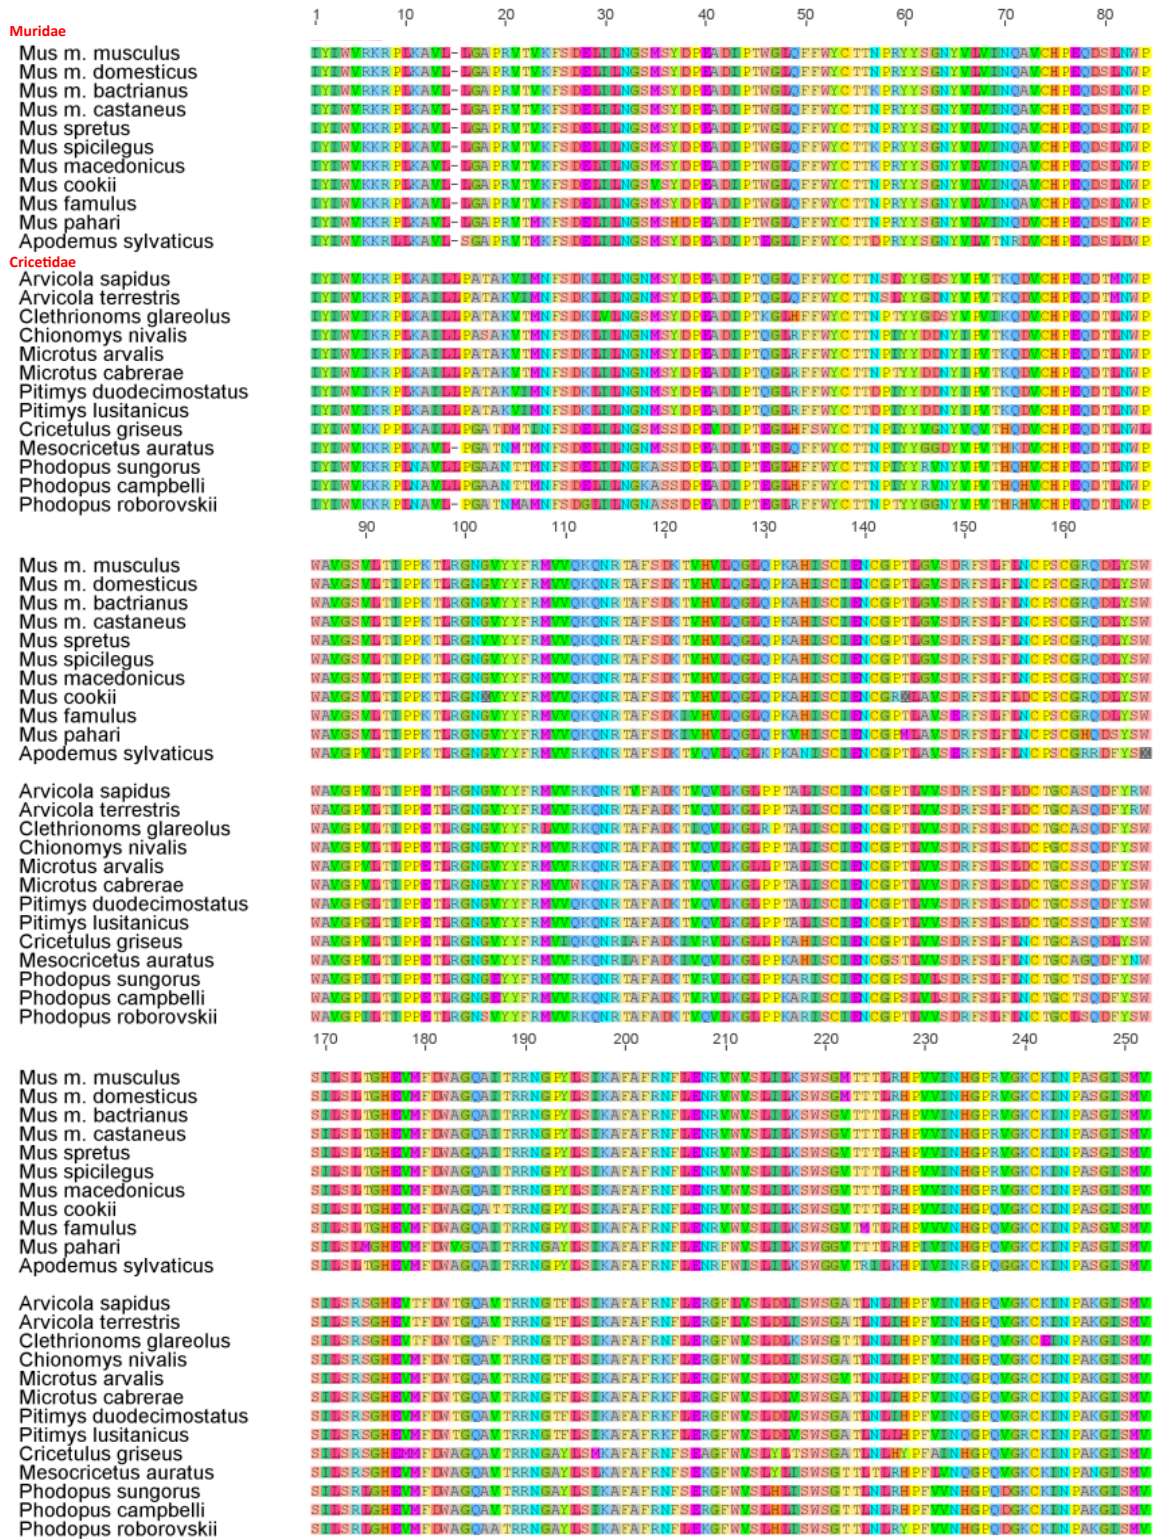

(cont.)

Supplementary Figure S1 (cont.)

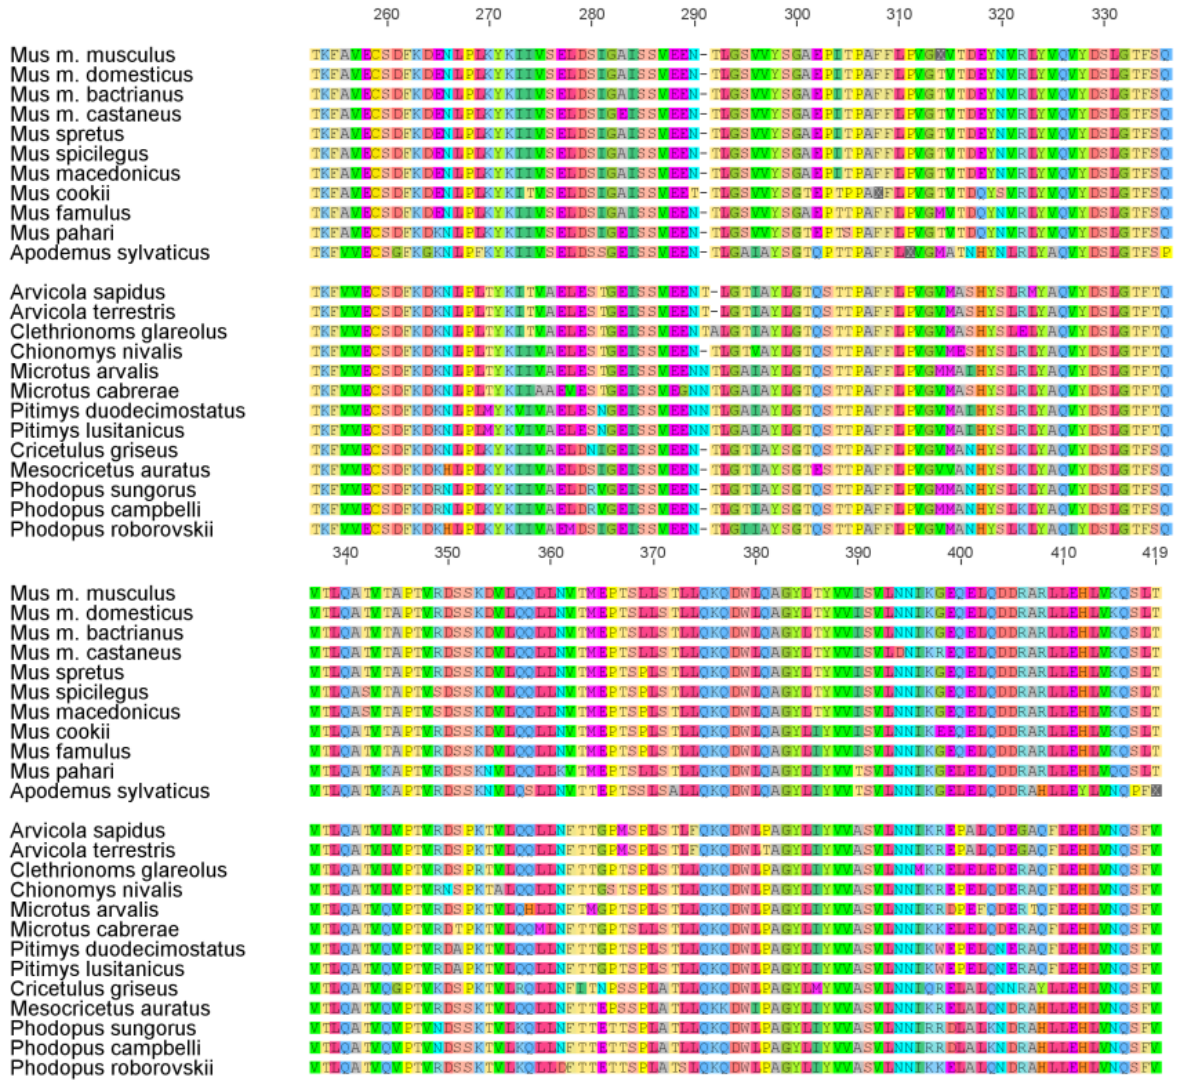

**Supplementary Figure S2** Cladograms of rodents used for evolutionary analyses. The analyses were performed considering the two possible topologies derived from the polytomy of *Mus musculus* subspecies.

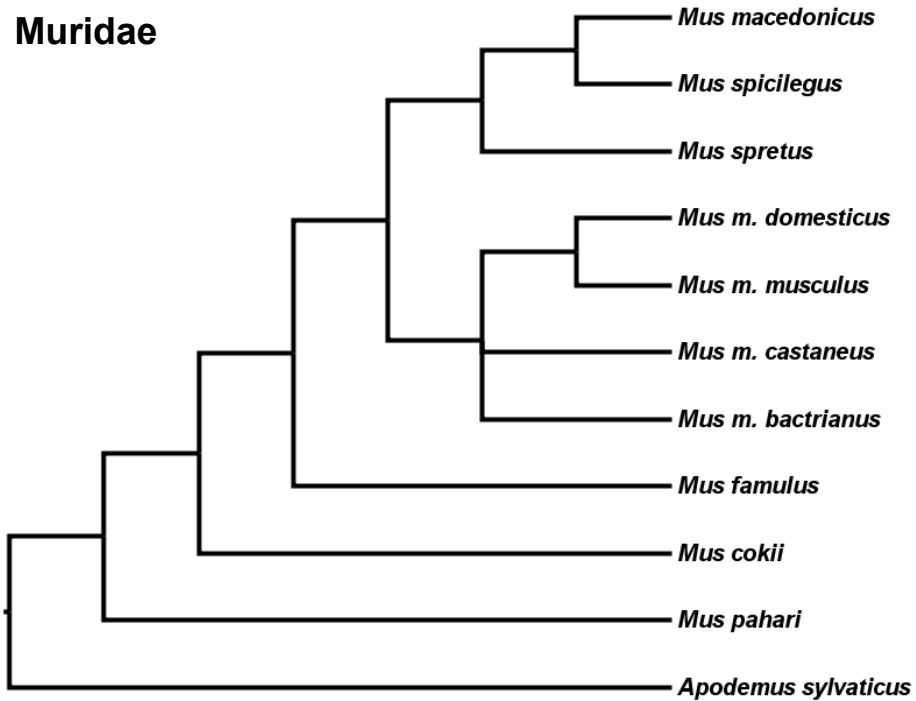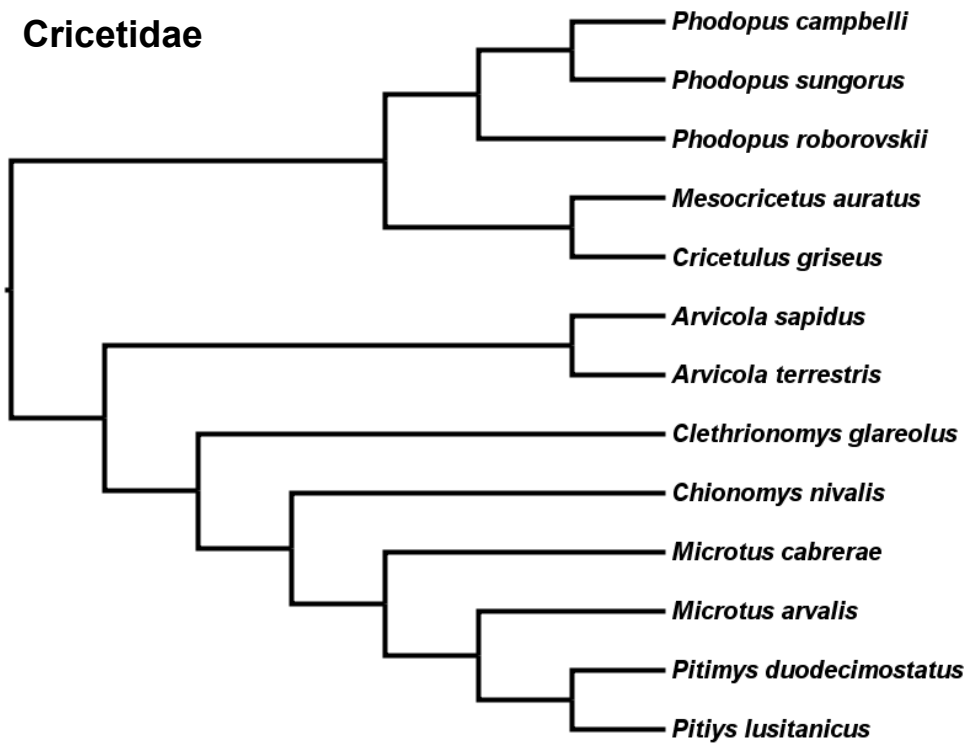

**Supplementary Table SI** Primers used for amplification of PKDREJ in rodent species.

| <b>Primer</b>   | <b>Sequence</b>         |
|-----------------|-------------------------|
| PKDREJ 1-Fw     | TTACGGGGTGTATGTGTTAAC   |
| PKDREJ 1-Rv     | CTGGGTAAATTTGGTAATCAC   |
| PKDREJ 3-Rv     | TCGTCCTCTGTGTTTCATAGCAA |
| PKDREJ Vol 1-Fw | CTGTCCATCAACAGGTGGGA    |
| PKDREJ Vol 1-Rv | AGTACCCTGGACGAGATCTGC   |
| PKDREJ 1 Ham-Fw | CCTGTAACATACAGTCCGTG    |
| PKDREJ 1 Ham-Rv | ATCACCACCTGGCAGATCTG    |
| Fw int PKDREJ   | ATGTTTGACTGGGCAGGGCAAG  |
| Rv int PKDREJ   | CCTGCCAGTCAAACATCACTCA  |

  

| <b>Species</b>                                                                                                                                                                                                                                      | <b>Primer pairs</b>               |
|-----------------------------------------------------------------------------------------------------------------------------------------------------------------------------------------------------------------------------------------------------|-----------------------------------|
| <i>Mus m. musculus</i> , <i>Mus m. domesticus</i> , <i>Mus m. castaneus</i> , <i>Mus m. bactrianus</i> , <i>Mus spretus</i> , <i>Mus spicilegus</i> , <i>Mus macedonicus</i> , <i>Mus famulus</i> , <i>Mus cokii</i> , <i>Apodemus sylvaticus</i> . | PKDREJ 1-Fw / PKDREJ 1-Rv         |
| <i>Mus pahari</i> .                                                                                                                                                                                                                                 | PKDREJ 1-Fw / PKDREJ 3-Rv         |
| <i>Arvicola sapidus</i> , <i>Arvicola terrestris</i> , <i>Clethrionomys glareolus</i> , <i>Chinomys nivalis</i> , <i>Pitymys duodecimostatus</i> , <i>Pitymys lusitanicus</i> .                                                                     | PKDREJ 1-Fw / PKDREJ Vol 1-Rv     |
| <i>Microtus arvalis</i> , <i>Microtus cabrerae</i> .                                                                                                                                                                                                | PKDREJ Vol 1-Fw / PKDREJ Vol 1-Rv |
| <i>Cricetulus griseus</i> , <i>Mesocricetus auratus</i> , <i>Phodopus sungorus</i> , <i>Phodopus campbelli</i> , <i>Phodopus roborovskii</i> .                                                                                                      | PKDREJ Ham 1-Fw / PKDREJ Ham 1-Rv |

**Supplementary Table SII** Body mass, testes mass and log residual testes mass of primates.

| <b>Species</b>            | <b>Body mass<br/>(g)</b> | <b>Testes mass<br/>(g)</b> | <b>log residual<br/>testes mass</b> | <b>Reference</b>            |
|---------------------------|--------------------------|----------------------------|-------------------------------------|-----------------------------|
| <i>Macaca mulatta</i>     | 10430                    | 76.0                       | 0.569                               | Kenagy and Trombulak (1986) |
| <i>Macaca nemestrina</i>  | 9980                     | 66.7                       | 0.525                               | Kenagy and Trombulak (1986) |
| <i>Ateles geoffroyi</i>   | 9800                     | 64.2                       | 0.514                               | Anderson and Dixson (2004)  |
| <i>Pan panyscus</i>       | 39100                    | 135.2                      | 0.456                               | Anderson and Dixson (2004)  |
| <i>Pan troglodytes</i>    | 44340                    | 118.8                      | 0.366                               | Kenagy and Trombulak (1986) |
| <i>Homo sapiens</i>       | 63540                    | 50.2                       | -0.107                              | Kenagy and Trombulak (1986) |
| <i>Callithrix jacchus</i> | 320                      | 1.3                        | -0.24                               | Kenagy and Trombulak (1986) |
| <i>Pongo pygmaeus</i>     | 74640                    | 36.3                       | -0.292                              | Kenagy and Trombulak (1986) |
| <i>Saguinus labiatus</i>  | 501                      | 1.5                        | -0.307                              | Kenagy and Trombulak (1986) |
| <i>Lemur catta</i>        | 27000                    | 17.8                       | -0.322                              | Anderson and Dixson (2004)  |
| <i>Erythrocebus patas</i> | 13000                    | 7.2                        | -0.515                              | Anderson and Dixson (2004)  |
| <i>Gorilla gorilla</i>    | 134000                   | 23.2                       | -0.648                              | Kenagy and Trombulak (1986) |

**Supplementary Table SIII** Body mass, testes mass and log residual testes mass of rodents.

| <b>Family</b> | <b>Species</b>                 | <b>Body mass<br/>(g)</b> | <b>Testes mass<br/>(g)</b> | <b>log residual<br/>testes mass</b> |
|---------------|--------------------------------|--------------------------|----------------------------|-------------------------------------|
| Muridae       | <i>Apodemus sylvaticus</i>     | 30.43                    | 0.962                      | 0.58                                |
|               | <i>Mus spicilegus</i>          | 14.49                    | 0.409                      | 0.23                                |
|               | <i>Mus spretus</i>             | 17.01                    | 0.295                      | 0.08                                |
|               | <i>Mus macedonicus</i>         | 18.40                    | 0.282                      | 0.05                                |
|               | <i>Mus cookii</i>              | 23.67                    | 0.305                      | 0.01                                |
|               | <i>Mus m. bactrianus</i>       | 18.60                    | 0.175                      | -0.06                               |
|               | <i>Mus m. domesticus</i>       | 16.36                    | 0.135                      | -0.07                               |
|               | <i>Mus m. musculus</i>         | 21.13                    | 0.134                      | -0.13                               |
|               | <i>Mus m. castaneus</i>        | 19.50                    | 0.1                        | -0.14                               |
|               | <i>Mus pahari</i>              | 30.08                    | 0.118                      | -0.26                               |
|               | <i>Mus famulus</i>             | 27.40                    | 0.053                      | -0.29                               |
| Cricetidae    | <i>Mesocricetus auratus</i>    | 88.59                    | 2.893                      | 1.55                                |
|               | <i>Cricetulus griseus</i>      | 36.37                    | 2.27                       | 1.41                                |
|               | <i>Phodopus campbelli</i>      | 45.38                    | 2.105                      | 1.16                                |
|               | <i>Phodopus sungorus</i>       | 39.42                    | 1.211                      | 0.32                                |
|               | <i>Phodopus roborovskii</i>    | 21.07                    | 0.706                      | -0.02                               |
|               | <i>Chionomys nivalis</i>       | 43.64                    | 0.851                      | -0.08                               |
|               | <i>Arvicola sapidus</i>        | 209.75                   | 2.144                      | -0.31                               |
|               | <i>Clethrionomys glareolus</i> | 25.65                    | 0.401                      | -0.37                               |
|               | <i>Microtus arvalis</i>        | 36.40                    | 0.285                      | -0.58                               |
|               | <i>Pitimys lusitanicus</i>     | 17.73                    | 0.093                      | -0.6                                |
|               | <i>Pitimys duodecimostatus</i> | 29.76                    | 0.076                      | -0.73                               |
|               | <i>Microtus cabreræ</i>        | 44.27                    | 0.142                      | -0.79                               |
|               | <i>Arvicola terrestris</i>     | 91.56                    | 0.411                      | -0.96                               |

**Supplementary Table IV** Lineage-specific evolutionary rates of PKDREJ in rodents. Parameters were calculated from the root of the phylogeny to the terminal branches.

| <b>Family</b> | <b>Species</b>                 | <b>dN</b> | <b>dS</b> | <b><math>\omega</math></b> |
|---------------|--------------------------------|-----------|-----------|----------------------------|
| Muridae       | <i>Mus spicilegus</i>          | 0.0829    | 0.1654    | 0.5013                     |
|               | <i>Mus spretus</i>             | 0.0794    | 0.1786    | 0.4449                     |
|               | <i>Mus macedonicus</i>         | 0.0829    | 0.1654    | 0.5015                     |
|               | <i>Mus cokii</i>               | 0.0844    | 0.1617    | 0.5217                     |
|               | <i>Mus musculus bactrianus</i> | 0.0818    | 0.1654    | 0.4944                     |
|               | <i>Mus domesticus</i>          | 0.0806    | 0.1654    | 0.4873                     |
|               | <i>Mus musculus musculus</i>   | 0.0806    | 0.1654    | 0.4873                     |
|               | <i>Mus musculus castaneus</i>  | 0.0829    | 0.1680    | 0.4937                     |
|               | <i>Mus pahari</i>              | 0.0775    | 0.1661    | 0.4663                     |
|               | <i>Mus famulus</i>             | 0.0806    | 0.1641    | 0.4910                     |
|               | <i>Apodemus sylvaticus</i>     | 0.0627    | 0.1478    | 0.4242                     |
| Cricetidae    | <i>Arvicola sapidus</i>        | 0.1070    | 0.2850    | 0.3754                     |
|               | <i>Arvicola terrestris</i>     | 0.1050    | 0.2930    | 0.3584                     |
|               | <i>Clethrionomys glareolus</i> | 0.1210    | 0.3010    | 0.4020                     |
|               | <i>Chionomys nivalis</i>       | 0.1120    | 0.2810    | 0.3986                     |
|               | <i>Microtus arvalis</i>        | 0.1190    | 0.2910    | 0.4089                     |
|               | <i>Microtus cabrerai</i>       | 0.1210    | 0.2910    | 0.4158                     |
|               | <i>Pitimys duodecimostatus</i> | 0.1210    | 0.2910    | 0.4158                     |
|               | <i>Pitimys lusitanicus</i>     | 0.1220    | 0.2940    | 0.4150                     |
|               | <i>Mesocricetus auratus</i>    | 0.0990    | 0.2230    | 0.4439                     |
|               | <i>Cricetulus griseus</i>      | 0.1210    | 0.2320    | 0.5216                     |
|               | <i>Phodopus sungorus</i>       | 0.1080    | 0.2620    | 0.4122                     |
|               | <i>Phodopus campbelli</i>      | 0.1080    | 0.2620    | 0.4122                     |
|               | <i>Phodopus roborovskii</i>    | 0.1060    | 0.2880    | 0.3681                     |
